# Supplementary material for: Sialylated O -Glycans from Hen Egg White Ovomucin are Decomposed by Mucin-degrading Gut Microbes
Source: PubMed Central journal article supplement — J Appl Glycosci (1999). 2020 May 20;67(2):31–9. doi: 10.5458/jag.jag.JAG-2019_0020 (PMC8279891; doi:10.5458/jag.jag.jag-2019_0020), 2020-05-20
Supplement: 67_jag.JAG-2019_0020_1.pdf [file 67_jag.JAG-2019_0020_1.pdf]

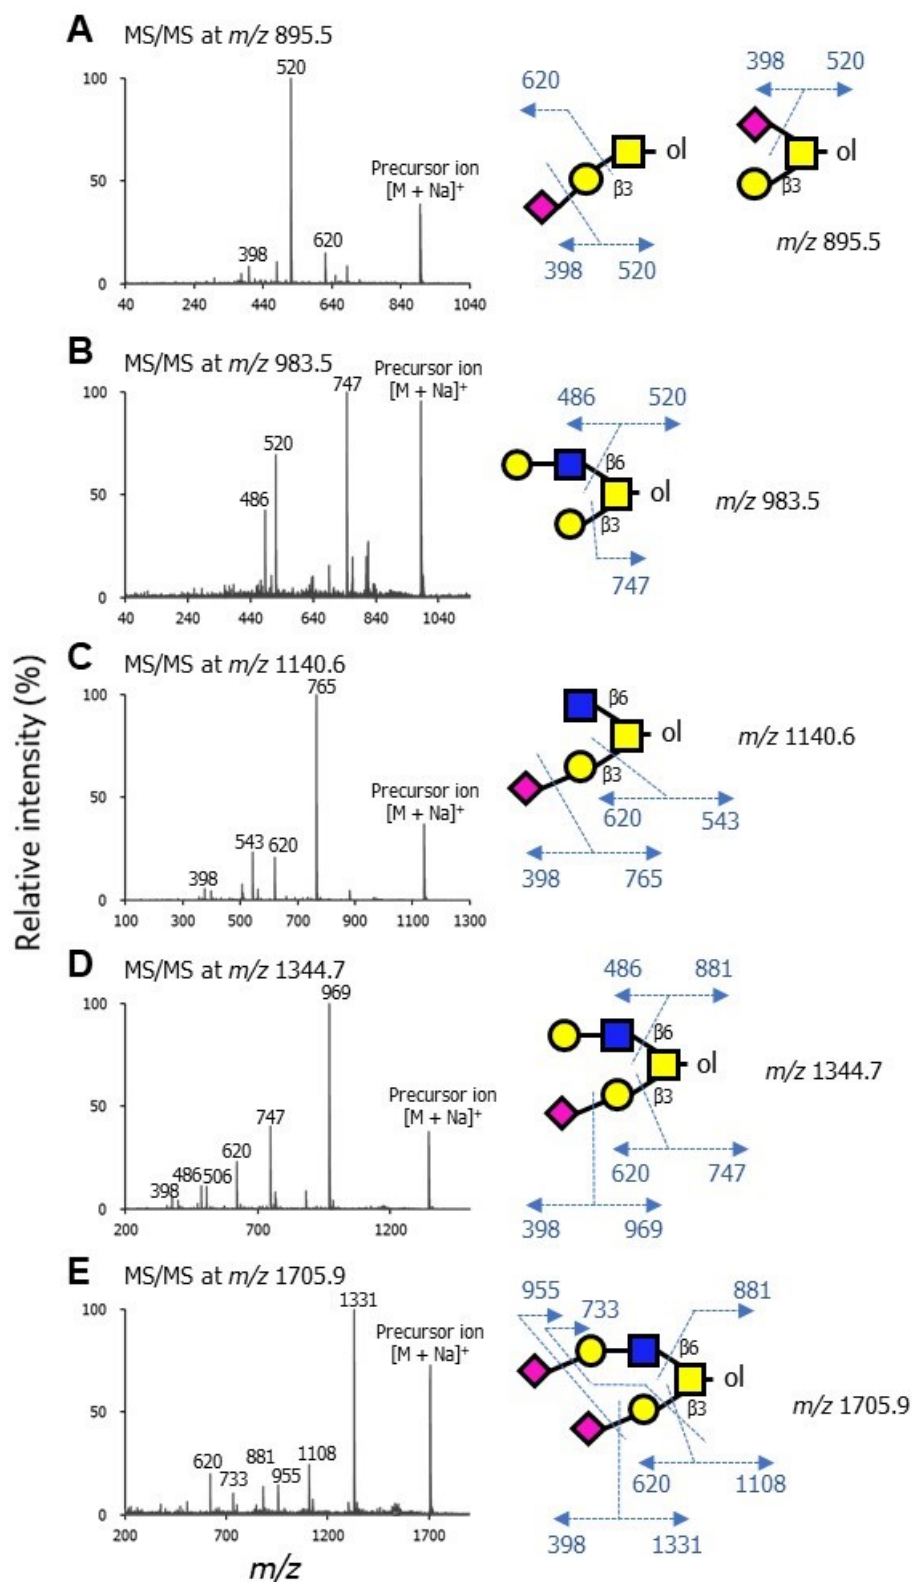

**Supplementary Fig. S1**, Selected MS/MS spectra of the permethylated non-sulfated *O*-glycan alditol released from ovomucin powder.

MS/MS spectra were obtained with MALDI-TOF/TOF/MS analyses in the positive ion mode for each glycan ion peak. MS/MS spectra are shown for five major non-sulfated *O*-glycans,  $m/z$  895.5 (A), 983.5 (B), 1140.6 (C), 1344.7 (D), and 1705.9 (E), and the estimated structures based on each MS/MS fragment pattern are shown.
