# Supplementary material for: Sialylated O -Glycans from Hen Egg White Ovomucin are Decomposed by Mucin-degrading Gut Microbes
Source: PubMed Central journal article supplement — J Appl Glycosci (1999). 2020 May 20;67(2):31–9. doi: 10.5458/jag.jag.JAG-2019_0020 (PMC8279891; doi:10.5458/jag.jag.jag-2019_0020), 2020-05-20
Supplement: 67_jag.JAG-2019_0020_3.pdf [file 67_jag.JAG-2019_0020_3.pdf]

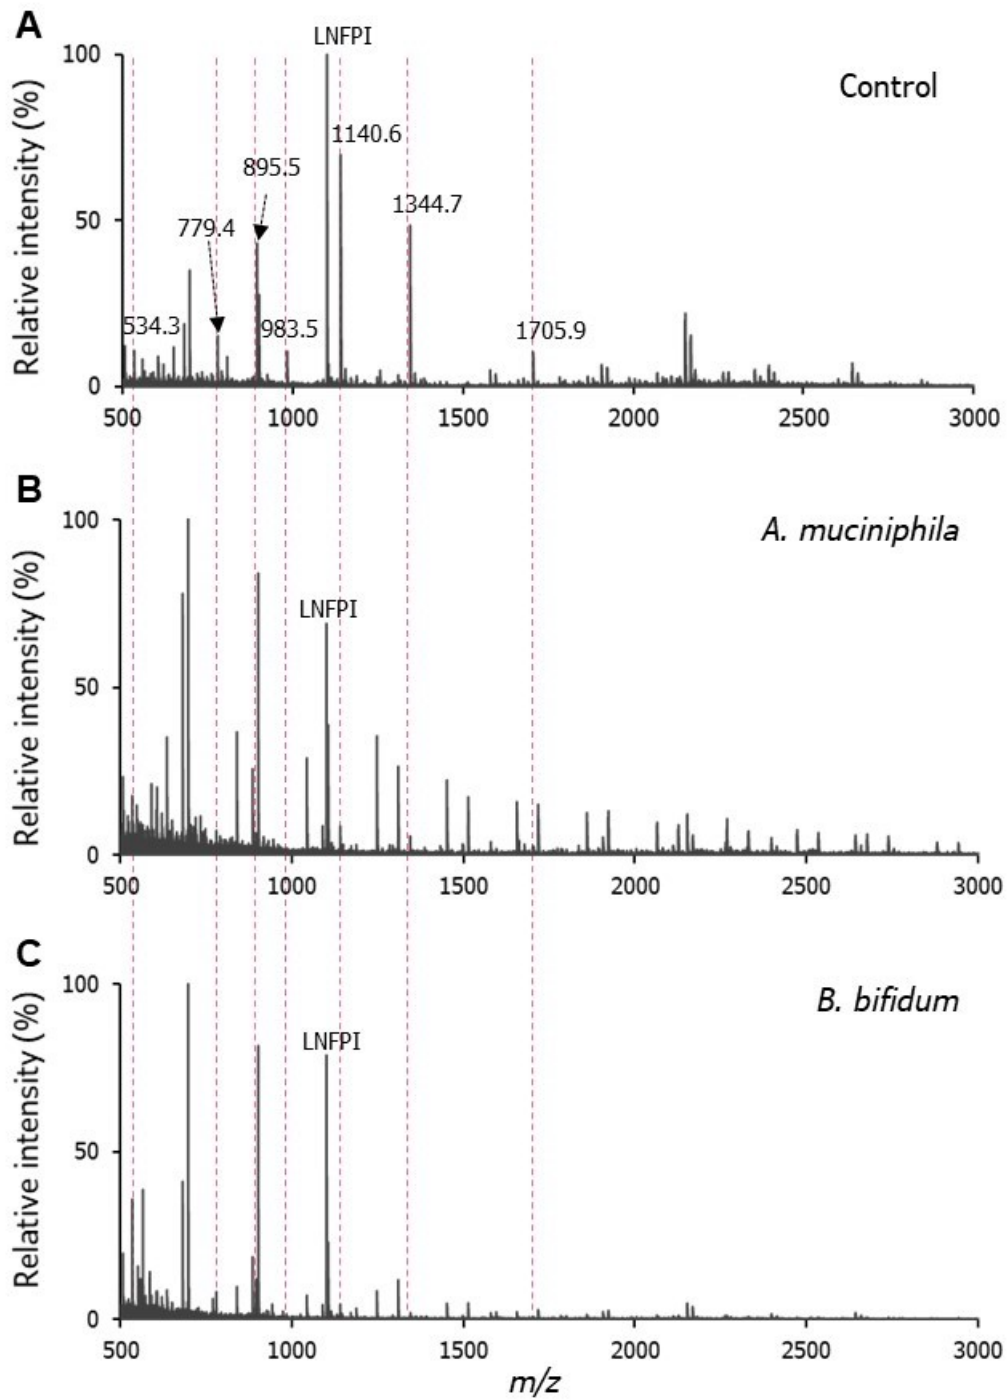

**Supplementary Fig. S3**, Comparison of full mass profiles of permethylated non-sulfated *O*-glycan alditols released from ovomucin after the culture with mucin-degrading gut microbes.

(A) *O*-Glycans from ovomucin control (no bacteria). (B) Cultured with *Akkermansia muciniphila*. (C) Cultured with *Bifidobacterium bifidum*.
