# Supplementary material for: Sialylated O -Glycans from Hen Egg White Ovomucin are Decomposed by Mucin-degrading Gut Microbes
Source: PubMed Central journal article supplement — J Appl Glycosci (1999). 2020 May 20;67(2):31–9. doi: 10.5458/jag.jag.JAG-2019_0020 (PMC8279891; doi:10.5458/jag.jag.jag-2019_0020), 2020-05-20
Supplement: 67_jag.JAG-2019_0020_4.pdf [file 67_jag.JAG-2019_0020_4.pdf]

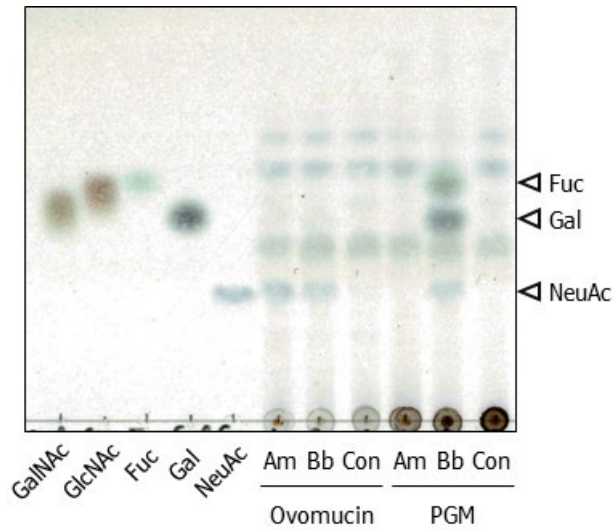

**Supplementary Fig. S4**, Thin-layer chromatography analysis of free sugars in the culture supernatants of ovomucin- and PGM-supplemented media after 24 h incubation.

Culture supernatants of *Akkermansia muciniphila* (Am) and *Bifidobacterium bifidum* (Bb) in basal media supplemented with 0.5% mucins were separated in a solvent of 1-butanol: acetic acid: water = 2/1/1 (v/v/v) with monosaccharide standards and a control with no bacteria (Con). Sugars were stained with diphenylamine-aniline reagent (100 mL acetone, 1 g diphenylamine, 1 mL aniline, 10 mL phosphoric acid) and colored by heating.
